# Supplementary material for: Reply to the ‘Comment on “Lewis acid-surfactant complex catalyzed polymerization in aqueous dispersed media: cationic or radical polymerization?”’ by I. V. Vasilenko, F. Ganachaud and S. V. Kostjuk, Polym. Chem., 2024, 15, DOI: 10.1039/D3PY00661A
Source: Royal Society of Chemistry journal article supplement (doi:10.1039/d3py01067h), 2024-01-01
Supplement: d3py01067h1.pdf [file d3py01067h1.pdf]

Supplementary information

# Reply to the ‘Comment on “Lewis acid-surfactant complex catalyzed polymerization in aqueous dispersed media: cationic or radical polymerization?”’

by I. V. Vasilenko, F. Ganachaud and S. V. Kostjuk, *Polym. Chem.*, 2024, **15**,

DOI: 10.1039/D3PY00661A

Nicholas Ballard<sup>a,b\*</sup> and Aurelie Destephen<sup>a</sup>

<sup>a</sup> POLYMAT, University of the Basque Country UPV/EHU, Joxe Mari Korta zentroa, Tolosa Hiribidea 72, 20018 Donostia-San Sebastián, Spain

<sup>b</sup> Ikerbasque, Basque Foundation for Science, 48013 Bilbao, Spain

\*Corresponding author: E-mail address: nicholas.ballard@polymat.eu (N. Ballard)

## Experimental

### Materials

Styrene (Quimidroga, technical grade) was distilled under reduced pressure prior to use and stored at -22 °C. Toluene (Sigma Aldrich, ≥99.5 %), 2,2'-Azobis(isobutyronitrile) (AIBN, Sigma Aldrich, 98%) and pentachlorophenol (PCP, Sigma Aldrich, 97%) were used as received.

### Methods

Gel permeation chromatography (GPC) was conducted using three columns in series (Styragel HR2, HR4 and HR6) with a refractive index (RI) detector (Waters 2410). The flow rate at which THF was eluted was 1 mL.min<sup>-1</sup>. For the sample preparation, solutions of 5 mg of polymer per millilitre of THF were prepared and filtered through a nylon filter with 45 µm pores. The molecular weight of the polymers were calculated using the RI detector and the results were based on polystyrene standards.

### Polymerizations

Reactions were carried out in 25 mL round bottomed flask which was sealed using a rubber septum but without attempting to remove oxygen from solution. In a first reaction, 7 g styrene, 3 g toluene and 0.07 g AIBN were added to the flask which was then sealed and heated to 70 °C for 9 h. In a second reaction, 7 g styrene, 3 g toluene, 0.07 g AIBN and 0.65 g pentachlorophenol were added to the flask which was then sealed and heated to 70 °C for 9 h. The final conversion was determined gravimetrically. The polymer was precipitated in cold methanol and dried before being dissolved in THF for the GPC measurement.
